# Supplementary material
Source: PubMed Central journal article supplement (PMC5293337)
Supplement: CJN.06290616SupplementaryData1.pdf [file CJN.06290616SupplementaryData1.pdf]

Jan M. Hughes-Austin, PT, PhD\*,†, Dena E. Rifkin, MD†,‡,§, Tomasz Beben, MD§,  
Ronit Katz, DPhil,||, ¶ Mark J. Sarnak, MD, MS\*\*, Rajat Deo, MD††, Andy N. Hoofnagle,  
MD, PhD‡‡, Shunichi Homma, MD§§, David S. Siscovick, MD, MPH|||, Nona  
Sotoodehnia, MD, MPH¶¶, Bruce M. Psaty, MD, PhD, MPH\*\*\*,†††, Ian H. de Boer, MD,  
MS, ||, ¶, Bryan Kestenbaum, MD, MS, ||, ¶, Michael G. Shlipak, MD‡‡‡, Joachim H. Ix,  
MD, MAS†,‡,§

\* Department of Orthopaedic Surgery, School of Medicine, University of California, San Diego, La Jolla, California, USA ([jhughesaustin@ucsd.edu](mailto:jhughesaustin@ucsd.edu))

† Division of Preventive Medicine, Department of Family Medicine and Public Health, School of Medicine, University of California, San Diego, La Jolla, California, USA.

‡ Division of Nephrology-Hypertension, Department of Medicine, School of Medicine, University of California, San Diego, La Jolla, California, USA ([joix@ucsd.edu](mailto:joix@ucsd.edu))  
([drifkin@ucsd.edu](mailto:drifkin@ucsd.edu))

§San Diego VA Healthcare System, La Jolla, California, USA. ([tbeben@ucsd.edu](mailto:tbeben@ucsd.edu))

|| Division of Nephrology, Department of Medicine, University of Washington, Seattle, Washington, USA. ([rkatz@u.washington.edu](mailto:rkatz@u.washington.edu)) ([brk@u.washington.edu](mailto:brk@u.washington.edu)) ([ldeBoer@nephrology.washington.edu](mailto:ldeBoer@nephrology.washington.edu))

¶ Kidney Research Institute, University of Washington, Seattle, Washington, USA

\*\* Division of Medicine, Sackler School of Graduate and Biomedical Sciences, Tufts University, Boston, Massachusetts, USA. ([msarnak@tuftsmedicalcenter.org](mailto:msarnak@tuftsmedicalcenter.org))

†† Cardiovascular Medicine Division, Department of Medicine, University of Pennsylvania, Philadelphia, Pennsylvania, USA. ([Rajat.Deo@uphs.upenn.edu](mailto:Rajat.Deo@uphs.upenn.edu))

‡‡ Division of Clinical Chemistry, Department of Laboratory Medicine, University of Washington, Seattle, Washington, USA ([ahoof@u.washington.edu](mailto:ahoof@u.washington.edu))

§§ Division of Cardiology, Department of Medicine, Columbia University, New York, New York, USA ([sh23@columbia.edu](mailto:sh23@columbia.edu))

||| New York Academy of Medicine, New York, New York, USA ([dsiscovick@nyam.org](mailto:dsiscovick@nyam.org))

¶¶ Division of Cardiology, Department of Medicine, University of Washington, Seattle, Washington, USA. ([nsotoo@u.washington.edu](mailto:nsotoo@u.washington.edu))

\*\*\* Cardiovascular Health Research Unit, Departments of Medicine, Epidemiology and Health Services, University of Washington, Seattle, Washington, USA

([psaty@u.washington.edu](mailto:psaty@u.washington.edu))

††† Group Health Research Institute, Group Health Cooperative, Seattle, Washington, USA

‡‡‡ General Internal Medicine Section, San Francisco VA Medical Center, San Francisco, California, USA. ([Michael.shlipak@ucsf.edu](mailto:Michael.shlipak@ucsf.edu))

Corresponding Author:

Jan M. Hughes-Austin, PT, PhD

University of California, San Diego

9500 Gilman Drive, Mail Code 0863

La Jolla, California 92093-0863

Phone: 858-534-7135

Fax: 858-822-3807

Email: [jhughesaustin@ucsd.edu](mailto:jhughesaustin@ucsd.edu)
