# Supplementary material
Source: PubMed Central journal article supplement (PMC5293337)
Supplement: CJN.06290616SupplementaryData2.pdf [file CJN.06290616SupplementaryData2.pdf]

**Supplemental Table.** Associations between Categories of Serum Potassium with Cause of Death in CHS

| <b>Sudden Cardiac Death</b>            |                   |                   |                  |                   |                   |
|----------------------------------------|-------------------|-------------------|------------------|-------------------|-------------------|
| <b>Potassium Concentration (mEq/L)</b> | <b>&lt; 3.5</b>   | <b>3.5 - 3.9</b>  | <b>4.0 - 4.4</b> | <b>4.5 - 4.9</b>  | <b>≥ 5.0</b>      |
| #Events/P-Y                            | 2 / 2818.4        | 11 / 9798.3       | 44 / 26660       | 16 / 8311         | 1 / 680           |
| Event Rate (per 1000 P-Y)              | 0.71              | 1.12              | 1.65             | 1.93              | 1.47              |
| Age, Sex, Race                         | 0.46 (0.11, 1.89) | 0.72 (0.37, 1.41) | 1 (ref)          | 1.04 (0.58, 1.85) | 0.74 (0.10, 5.43) |
| Fully Adjusted*                        | 0.45 (0.10, 1.97) | 0.70 (0.36, 1.46) | 1 (ref)          | 1.04 (0.57, 1.91) | 0.80 (0.11, 5.85) |
| <b>Pulmonary Death</b>                 |                   |                   |                  |                   |                   |
| <b>Potassium Concentration (mEq/L)</b> | <b>&lt; 3.5</b>   | <b>3.5 - 3.9</b>  | <b>4.0 - 4.4</b> | <b>4.5 - 4.9</b>  | <b>≥ 5.0</b>      |
| #Events/P-Y                            | 15 / 4994         | 68 / 16931        | 171 / 44730      | 55 / 14966        | 4 / 1295          |
| Event Rate (per 1000 P-Y)              | 3.00              | 4.02              | 3.82             | 3.67              | 3.09              |
| Age, Sex, Race                         | 0.64 (0.37, 1.08) | 0.83 (0.63, 1.10) | 1 (ref)          | 1.04 (0.76, 1.41) | 0.74 (0.27, 2.00) |
| Fully Adjusted*                        | 0.64 (0.36, 1.13) | 0.83 (0.61, 1.12) | 1 (ref)          | 0.96 (0.70, 1.34) | 1.02 (0.37, 2.79) |
| <b>Cancer Death</b>                    |                   |                   |                  |                   |                   |
| <b>Potassium Concentration (mEq/L)</b> | <b>&lt; 3.5</b>   | <b>3.5 - 3.9</b>  | <b>4.0 - 4.4</b> | <b>4.5 - 4.9</b>  | <b>≥ 5.0</b>      |
| #Events/P-Y                            | 38 / 4994         | 160 / 16931       | 353 / 44730      | 136 / 14966       | 12 / 1295         |
| Event Rate (per 1000 P-Y)              | 7.61              | 9.45              | 7.89             | 9.09              | 9.27              |
| Age, Sex, Race                         | 0.80 (0.57, 1.12) | 0.91 (0.76, 1.10) | 1 (ref)          | 1.28 (1.04, 1.57) | 0.97 (0.54, 1.73) |
| Fully Adjusted*                        | 0.74 (0.50, 1.10) | 0.86 (0.70, 1.05) | 1 (ref)          | 1.23 (1.00, 1.52) | 1.13 (0.61, 2.08) |
| <b>Neurological Death</b>              |                   |                   |                  |                   |                   |
| <b>Potassium Concentration (mEq/L)</b> | <b>&lt; 3.5</b>   | <b>3.5 - 3.9</b>  | <b>4.0 - 4.4</b> | <b>4.5 - 4.9</b>  | <b>≥ 5.0</b>      |
| #Events/P-Y                            | 39 / 4994         | 122 / 16931       | 266 / 44730      | 92 / 14966        | 9 / 1295          |
| Event Rate (per 1000 P-Y)              | 7.81              | 7.21              | 5.95             | 6.15              | 6.95              |
| Age, Sex, Race                         | 0.99 (0.71, 1.40) | 0.91 (0.73, 1.13) | 1 (ref)          | 1.15 (0.90, 1.46) | 1.11 (0.56, 2.18) |
| Fully Adjusted*                        | 1.14 (0.77, 1.69) | 0.92 (0.73, 1.16) | 1 (ref)          | 1.27 (0.99, 1.63) | 1.36 (0.66, 2.78) |
| <b>Other Death</b>                     |                   |                   |                  |                   |                   |
| <b>Potassium Concentration (mEq/L)</b> | <b>&lt; 3.5</b>   | <b>3.5 - 3.9</b>  | <b>4.0 - 4.4</b> | <b>4.5 - 4.9</b>  | <b>≥ 5.0</b>      |
| #Events/P-Y                            | 28 / 4994         | 73 / 16931        | 217 / 44730      | 91 / 14966        | 11 / 1295         |
| Event Rate (per 1000 P-Y)              | 5.61              | 4.31              | 4.85             | 6.08              | 8.49              |
| Age, Sex, Race                         | 0.88 (0.59, 1.32) | 0.68 (0.52, 0.89) | 1 (ref)          | 1.37 (1.07, 1.76) | 1.54 (0.82, 2.88) |
| Fully Adjusted*                        | 0.83 (0.52, 1.31) | 0.70 (0.53, 0.92) | 1 (ref)          | 1.46 (1.13, 1.89) | 1.45 (0.73, 2.90) |

\*Adjusted for age, sex, race, time-varying eGFR, DM, SBP, current smoking, pack-years smoking, ever having cancer, ACE inhibitors, potassium sparing diuretics, other diuretics, NSAIDs, potassium supplements, other anti-hypertensive medications, beta blockers, and beta agonists

\*\*Analyses and Events/P-Y accounted for participants until December 2011
